# Supplementary material
Source: ML conference proceedings conference paper supplement (https://proceedings.mlr.press/v33/raykar14.html)
Supplement: Supplementary file 1 [file raykar14-supp.pdf]

---

**Sequential crowdsourced labeling as an epsilon-greedy exploration in  
a Markov Decision Process  
Supplementary material**

---

**Vikas C. Raykar**  
IBM Research, Bangalore, India

**Priyanka Agrawal**  
IBM Research, Bangalore, India

## A Variational Bayes updates for the single coin model

The joint likelihood of the observed labels  $\mathbf{y}_i$  and the true label  $z_i$  for the  $i^{\text{th}}$  instance given the annotator parameters  $\boldsymbol{\theta}$  can be factored as

$$p(\mathbf{y}_i, z_i | \boldsymbol{\theta}) = p(z_i) p(\mathbf{y}_i | z_i, \boldsymbol{\theta}) = p(z_i) \prod_{j \in \mathcal{M}_i} p(y_i^j | z_i, \theta^j) = p(z_i) \prod_{j \in \mathcal{M}_i} (\theta^j)^{\delta(y_i^j, z_i)} (1 - \theta^j)^{1 - \delta(y_i^j, z_i)},$$

where  $\delta(y_i^j, z_i) = 1$  if  $y_i^j = z_i$  and 0 otherwise. We have made an assumption that the labels provided by the different annotators for a given instance are independent conditional on the true label, which is a typical assumption made in most crowdsourcing algorithms. Hence

$$\ln p(\mathbf{y}_i, z_i | \boldsymbol{\theta}) = \ln p(z_i) + \sum_{j \in \mathcal{M}_i} \left[ \delta(y_i^j, z_i) \ln \theta^j + (1 - \delta(y_i^j, z_i)) \ln (1 - \theta^j) \right]. \quad (1)$$

**VBE-step:** Assuming the  $n$  instances are independent the updates for  $\mathbf{q}_z^{(t+1)}(\mathbf{z})$  can be broken down across the  $n$  instances as  $\mathbf{q}_z^{(t+1)}(\mathbf{z}) = \prod_{i=1}^n \mathbf{q}_{z_i}^{(t+1)}(z_i)$  where

$$\mathbf{q}_{z_i}^{(t+1)}(z_i) \propto \exp \left[ \mathbb{E}_{q_{\boldsymbol{\theta}}^{(t)}(\boldsymbol{\theta})} [\ln p(\mathbf{y}_i, z_i | \boldsymbol{\theta})] \right].$$

Taking the expectation of (1) with respect to  $q_{\boldsymbol{\theta}}^{(t)}(\boldsymbol{\theta})$  we have

$$\mathbb{E}_{q_{\boldsymbol{\theta}}^{(t)}(\boldsymbol{\theta})} [\ln p(\mathbf{y}_i, z_i | \boldsymbol{\theta})] = \ln p(z_i) + \sum_{j \in \mathcal{M}_i} \left[ \delta(y_i^j, z_i) \ln A^j + (1 - \delta(y_i^j, z_i)) \ln B^j \right],$$

where  $A^j := \exp \left( \mathbb{E}_{q_{\theta^j}^{(t)}(\theta^j)} [\ln \theta^j] \right)$  and  $B^j := \exp \left( \mathbb{E}_{q_{\theta^j}^{(t)}(\theta^j)} [\ln (1 - \theta^j)] \right)$ . If  $x \sim \text{Beta}(a, b)$  then  $\mathbb{E}[\ln x] = \text{Digamma}(a) - \text{Digamma}(a + b)$  and  $\mathbb{E}[\ln (1 - x)] = \text{Digamma}(b) - \text{Digamma}(a + b)$ . Hence we have the following updates for the hidden variable  $z_i$

$$q_{z_i}^{(t+1)}(z_i) \propto p(z_i) \prod_{j \in \mathcal{M}_i} (A^j)^{\delta(y_i^j, z_i)} (B^j)^{1 - \delta(y_i^j, z_i)}, \quad i = 1, \dots, n. \quad (2)$$

**VBM-step:** Similarly the updates for  $q_{\boldsymbol{\theta}}^{(t+1)}(\boldsymbol{\theta})$  can be broken down across the  $m$  annotators as  $q_{\boldsymbol{\theta}}^{(t+1)}(\boldsymbol{\theta}) = \prod_{j=1}^m q_{\theta^j}^{(t+1)}(\theta^j)$  where

$$q_{\theta^j}^{(t+1)}(\theta^j) \propto p(\theta^j) \cdot \exp \left[ \mathbb{E}_{q_z^{(t+1)}(\mathbf{z})} [\ln p(\mathbf{y}, \mathbf{z} | \theta^j)] \right].$$

Assuming the instances are independent and taking the expectation of (1) with respect to  $q_z^{(t+1)}(\mathbf{z})$

$$\mathbb{E}_{q_z^{(t+1)}(\mathbf{z})} [\ln p(\mathbf{y}, \mathbf{z} | \theta^j)] = \sum_{i \in \mathcal{N}^j} \ln p(z_i) + q_{z_i}^{(t+1)}(y_i^j) \ln \theta^j + (1 - q_{z_i}^{(t+1)}(y_i^j)) \ln (1 - \theta^j),$$

since  $\mathbb{E}_{q_{z_i}^{(t+1)}(z_i)} [\delta(y_i^j, z_i)] = q_{z_i}^{(t+1)}(y_i^j)$ . Hence we have the following updates for the annotator accuracy  $\theta^j$

$$q_{\theta^j}^{(t+1)}(\theta^j) \propto p(\theta^j) \prod_{i \in \mathcal{N}_j} (\theta^j)^{q_{z_i}^{(t+1)}(y_i^j)} (1 - \theta^j)^{1 - q_{z_i}^{(t+1)}(y_i^j)}, \quad j = 1, \dots, m. \quad (3)$$

As a consequence of using a beta prior for  $\theta^j$  the posterior is again a beta distribution

$$q_{\theta^j}^{(t+1)}(\theta^j) = \text{Beta} \left( \theta^j | a^j + \sum_{i \in \mathcal{N}_j} q_{z_i}^{(t+1)}(y_i^j), b^j + \sum_{i \in \mathcal{N}_j} 1 - q_{z_i}^{(t+1)}(y_i^j) \right).$$
